# Supplementary material for: Linezolid as an eradication agent against assembled methicillin-resistant Staphylococcus aureus biofilms
Source: Royal Society of Chemistry journal article supplement (doi:10.1039/c6ra19670e), 2016-01-01
Supplement: c6ra19670e1.pdf [file c6ra19670e1.pdf]

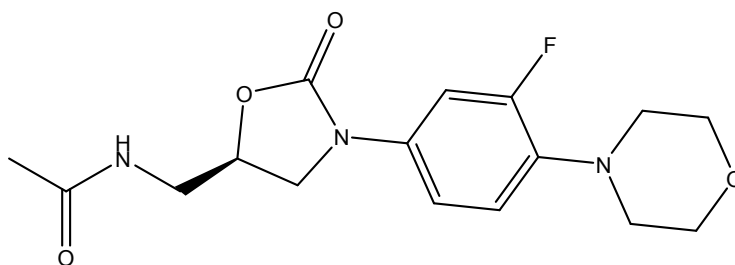

**Figure 1.** Linezolid chemical structure

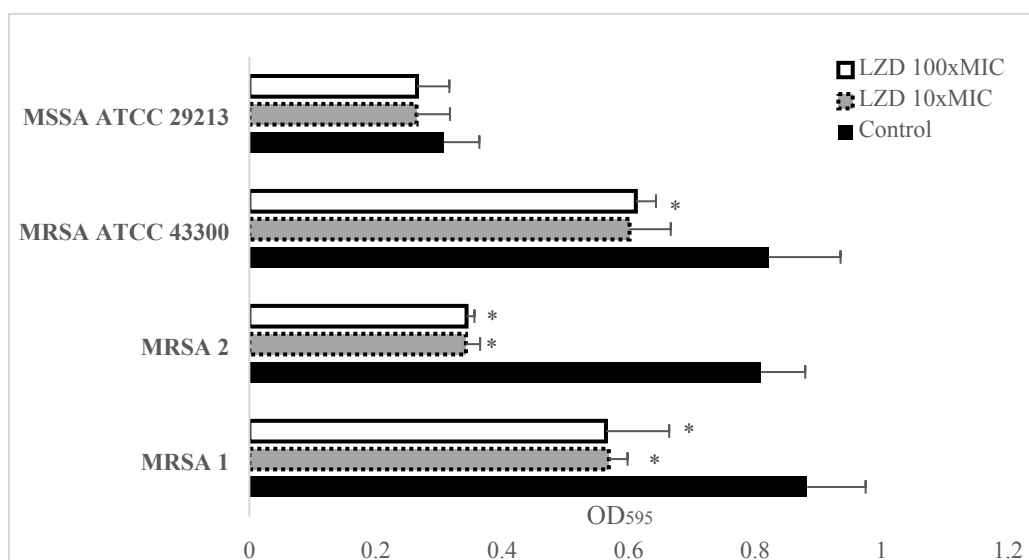

**Figure 2.** Disruption of assembled biofilms by LZD (10xMIC and 100xMIC) in MRSA 1, MRSA 2, MRSA ATCC 43300 and MSSA ATCC 29213, revealed using the crystal violet staining method. Each bullet point is derived from four duplicates of four independent experiments carried out on different days. Errors bars represent standard deviations of the means.  $p < 0.05^*$  respect to the control

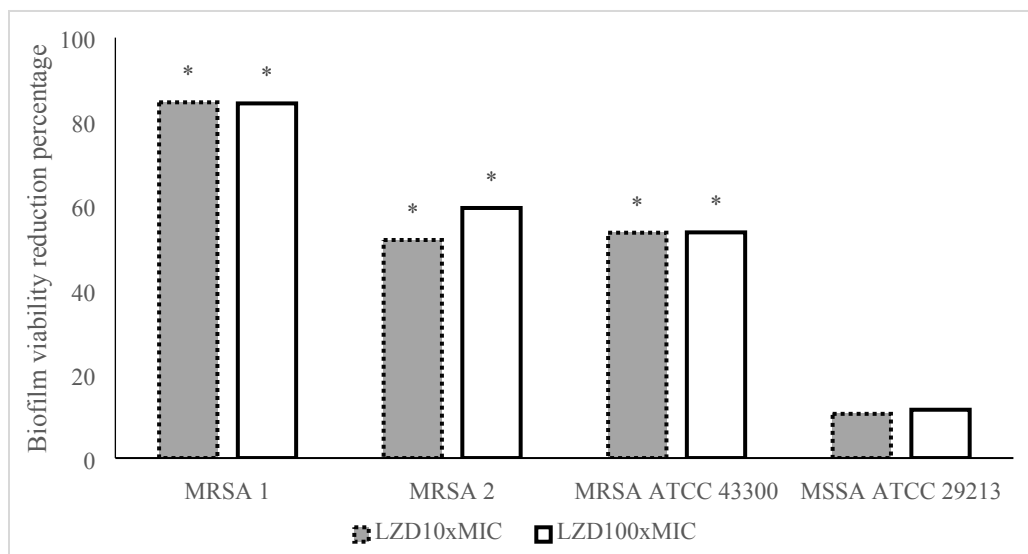

**Figure 3.** Biofilm-associated cell death percentage respect to the control obtained using the XTT assay. \*p < 0.05 respect to the control.

| TIME  |        | AREA $\mu\text{m}^2$ |        | COVER GLASS %   |  |
|-------|--------|----------------------|--------|-----------------|--|
| Hours | MRSA 1 | MRSA ATCC 43300      | MRSA 1 | MRSA ATCC 43300 |  |
| 0     | 2133.6 | 2159.6               | 77.0   | 77.9            |  |
| 12    | 1392.8 | 350.7                | 50.3   | 12.6            |  |
| 18    | 37.7   | 414.2                | 1.4    | 14.95           |  |
| 24    | 4.3    | 28.5                 | 0.1    | 1.0             |  |

**Table 1.** MRSA 1 and MRSA ATCC 43300 biofilms treated with LZD (10xMIC) at different times 0, 12, 18 and 24 h. The table represents the cover glass occupation percentage by the *S.aureus* biofilms.
